# Supplementary material
Source: publisher figshare collection journal article supplement (https://gsajournals.figshare.com/ndownloader/files/15368186)
Supplement: Supplementary file 1 [file 15368186]

## Sheet: Sheet1
Table S1. Oligonucleotides used for sgRNA construction
Oligo identity	Sequence (5’ to 3’)
fgfr3 sgRNA_1	TAGGACTATGTGGCGGGAGTCG
fgfr3 sgRNA_2	AAACCGACTCCCGCCACATAGT
fgfr4 sgRNA_1	TAGGAGACGTGTTGAGGCTGGC
fgfr4 sgRNA_2	TCTGCACAACTCCGACCGCAAA
fgfr1a sgRNA	aattaatacgactcactataGGCCTGGCAACGAAACTTCAgttttagagctagaaatagc
fgfr1b sgRNA	aattaatacgactcactataGGAAGCCAACTAGGACCTGAgttttagagctagaaatagc
fgfr2 sgRNA	aattaatacgactcactataGGGTGCACCGAGAACAGGACgttttagagctagaaatagc
Scaffold	gatccgcaccgactcggtgccactttttcaagttgataacggactagccttattttaacttgctatttctagctctaaaac
